# Supplementary material
Source: Springer Nature journal article supplement (https://www.springermedizin.de/resource/supplementary/12883_2013_974_MOESM4_ESM.pdf/9456536)
Supplement: MOESM4 [file 9456536]

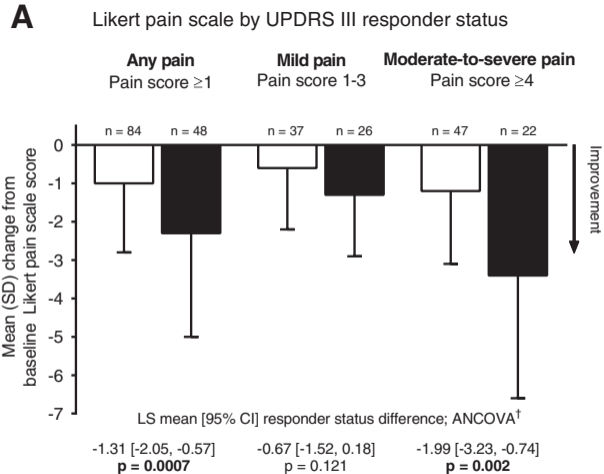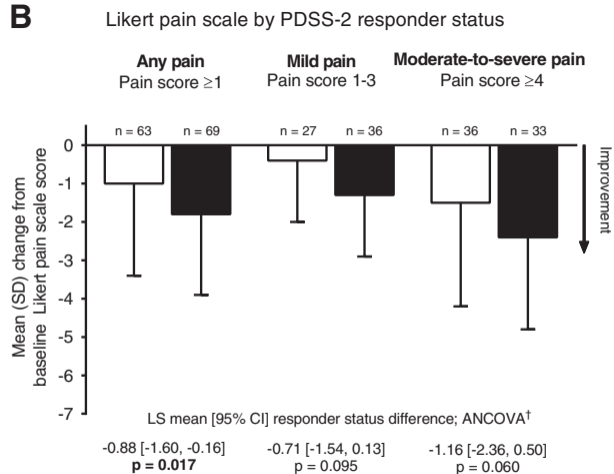

□ UPDRS III non-responder (rotigotine treated patients)

■ UPDRS III responder (rotigotine treated patients)

□ PDSS-2 non-responder (rotigotine treated patients)

■ PDSS-2 responder (rotigotine treated patients)
